# Supplementary material for: A novel dielectric elastomer by constructing dual-network structure of carbon nanotubes and rubber nanoparticles in dynamically vulcanized thermoplastic elastomer
Source: Royal Society of Chemistry journal article supplement (doi:10.1039/c6ra01463a), 2016-01-01
Supplement: c6ra01463a1.pdf [file c6ra01463a1.pdf]

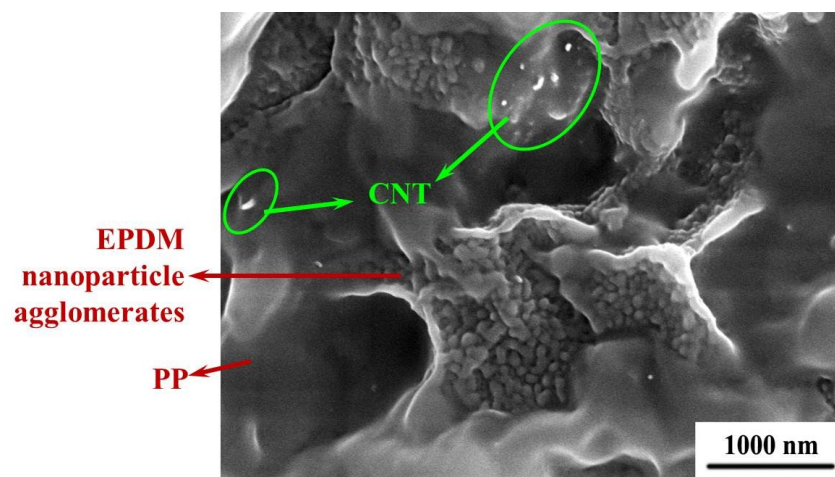

**Fig. S1.** SEM micrographs of CNTs/TPV composites with 0.5 wt% of CNTs

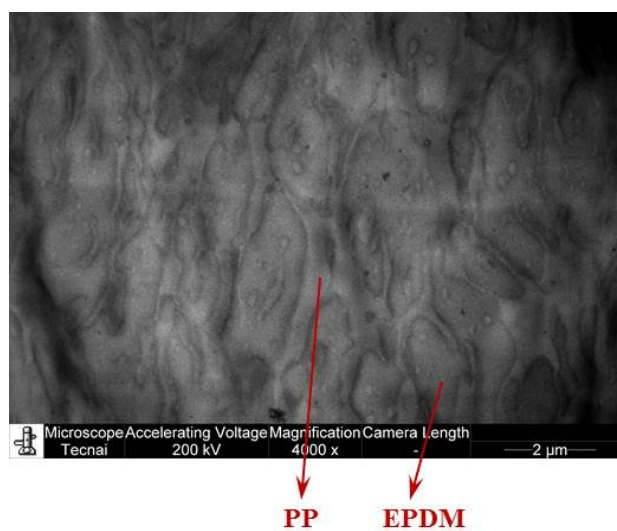

**Fig. S2.** TEM micrographs of CNTs/TPV composites with 1.2 wt% of CNTs at lower magnification.

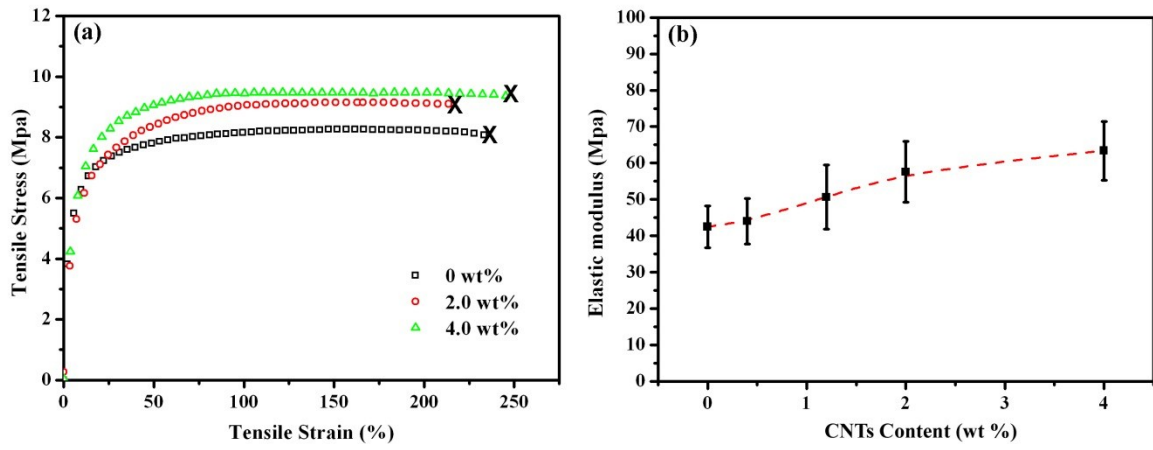

**Fig. S3.** Tensile properties for the CNTs/TPV composites with different CNTs contents: (a) the stress-strain curves for the composites; (b) the variation of the elastic modulus with the change in CNTs contents
